# Supplementary material for: Variations of the viscous properties of a sponge cake artificial bolus with some physiological parameters
Source: Royal Society of Chemistry journal article supplement (doi:10.1039/d1fo04213k), 2022-01-01
Supplement: d1fo04213k1.pdf [file d1fo04213k1.pdf]

1 AppendixA1

(a)

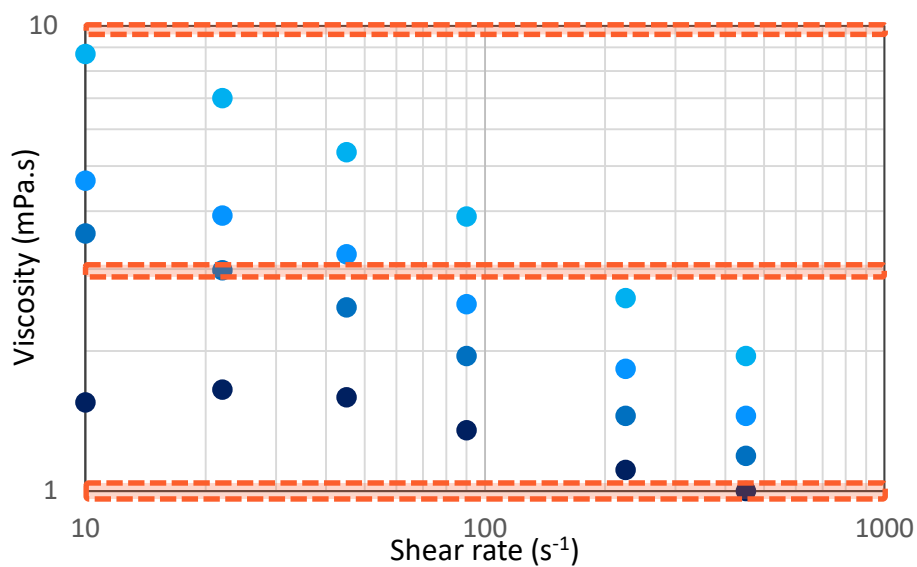

(b)

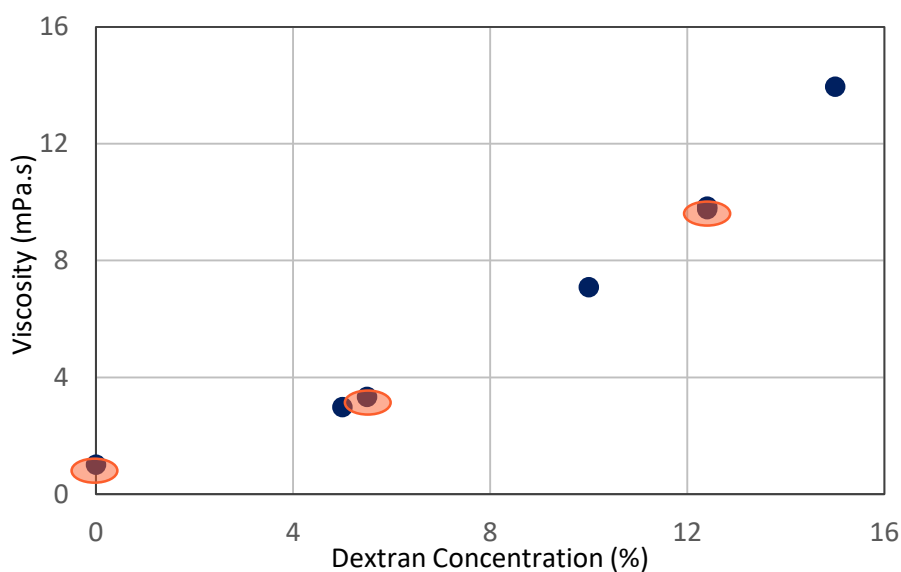

Fig.A1 : Viscosity of liquids : (a) flow curves of real saliva adapted from <sup>22</sup>, red dotted lines indicating target values for this study and (b) dextran solution as a function of concentration ; red spots indicating target viscosity.

2

3

4
